# Supplementary material for: Short Chain Fatty Acid Acetate Increases TNFα-Induced MCP-1 Production in Monocytic Cells via ACSL1/MAPK/NF-κB Axis
Source: MDPI journal article supplement (doi:10.3390/ijms22147683), 2021-07-19
Supplement: s1 [file s1]

## **Additional files/ Supplementary Figures**

**Title:** Short chain fatty acid acetate increases TNF $\alpha$ -induced MCP-1 production in monocytic cells via ACSL1/MAPK/NF-kB axis

**Authors:** Areej Al-Roub, Nadeem Akhter, Amnah Al-Sayyar, Ajit Wilson, Reeby Thomas, Shihab Kochumon, Fatema Al-Rashed, Fahd Al-Mulla, Sardar Sindhu, Rasheed Ahmad

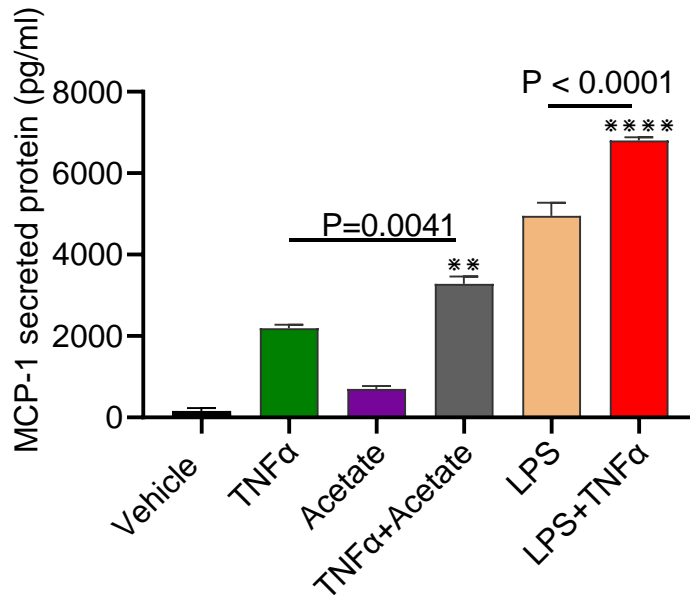

**Figure S1.** TNF $\alpha$ /LPS induces higher MCP-1 production compared to stimulation by TNF $\alpha$ /acetate. THP-1 monocytic cells were stimulated in triplicate wells with tumor necrosis factor (TNF)- $\alpha$  (10 ng/mL) with/without sodium acetate (100 mM) or TNF $\alpha$  (10 ng/mL) with/without lipopolysaccharide (LPS; 10 ng/mL) and cells were incubated at 37°C for 24h. Supernatants were harvested for determining MCP-1 levels by ELISA. The data obtained from 3 independent experiments with similar results show MCP-1 expression in response to co-stimulation by TNF $\alpha$ /acetate or by or TNF $\alpha$ /LPS. All data are expressed as mean  $\pm$  SEM (n = 3). \*\*p < 0.01, \*\*\*\*p < 0.0001.

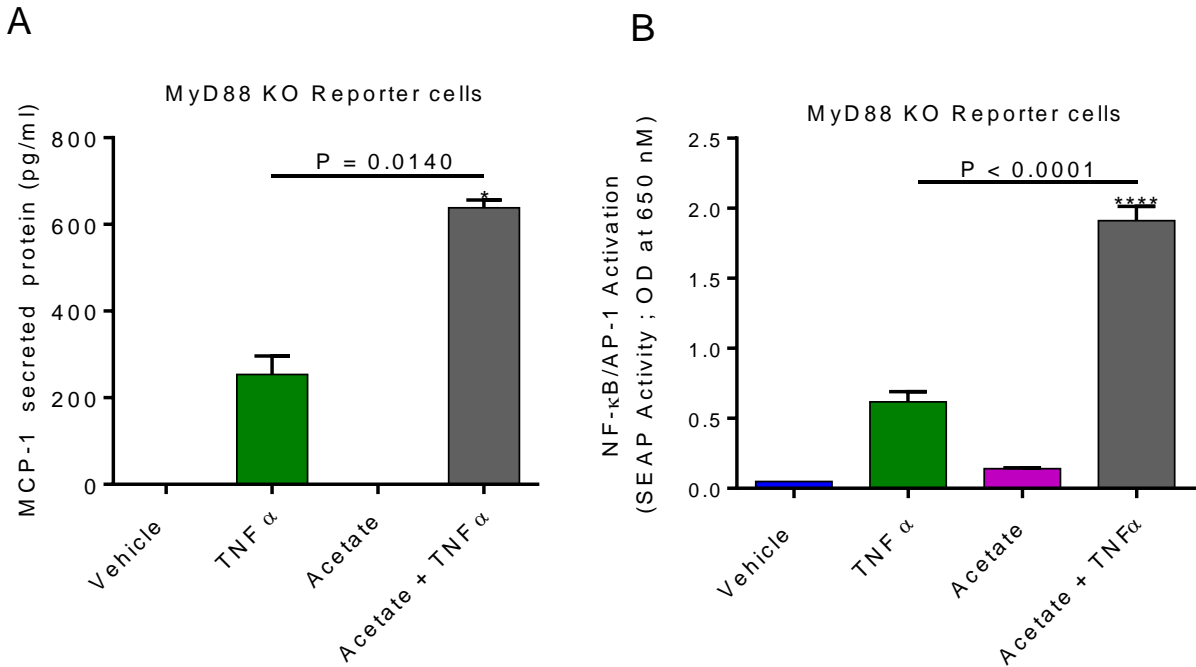

**Figure S2.** TNF $\alpha$  together with acetate increases MCP-1 and NF- $\kappa$ B/AP-1 activity independent of MyD88. (A) MyD88 Knockout reporter cells were treated as described. Culture media were collected. **(A)** MCP-1 protein was determined in the supernatant. **(B)** Cell culture media were assayed for SEAP reporter activity (degree of NF- $\kappa$ B/AP-1 activation). The results obtained from three independent experiments are shown. All data are expressed as mean  $\pm$  SEM ((n =3). \*p < 0.05, \*\*\*\*p < 0.0001 versus TNF- $\alpha$  alone.
